# Supplementary material for: Airflow obstruction and small airway dysfunction following pulmonary tuberculosis: a cross-sectional survey
Source: PubMed Central journal article supplement — Thorax. 2022 Mar 31;78(3):274–80. doi: 10.1136/thoraxjnl-2021-218345 (PMC9985725; doi:10.1136/thoraxjnl-2021-218345), 2022-03-31
Supplement: thoraxjnl-2021-218345supp001.pdf [file thoraxjnl-2021-218345supp001.pdf]

**Figure E1. Flow diagram of the study sample.**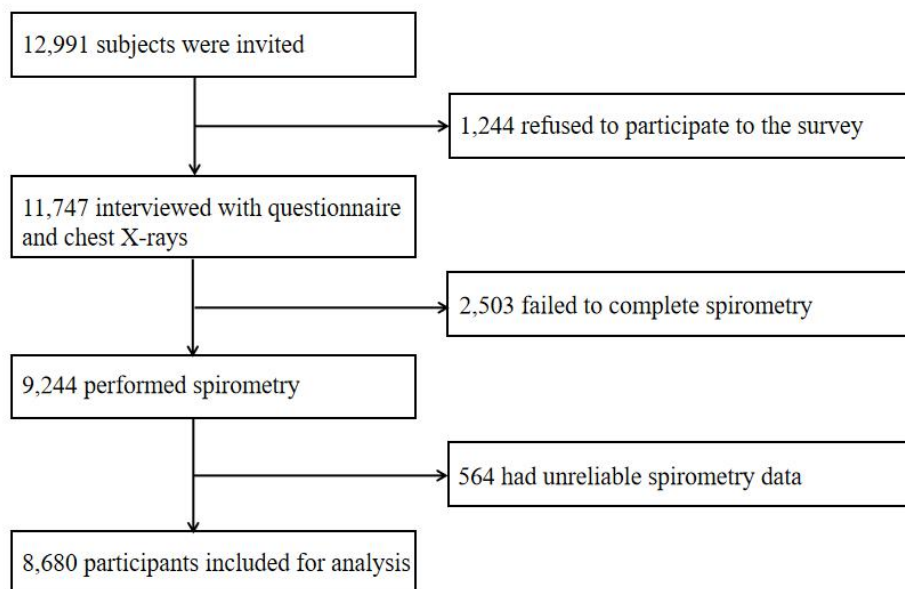

**Figure E2. Proportion of subjects with airflow obstruction according to post TB status.**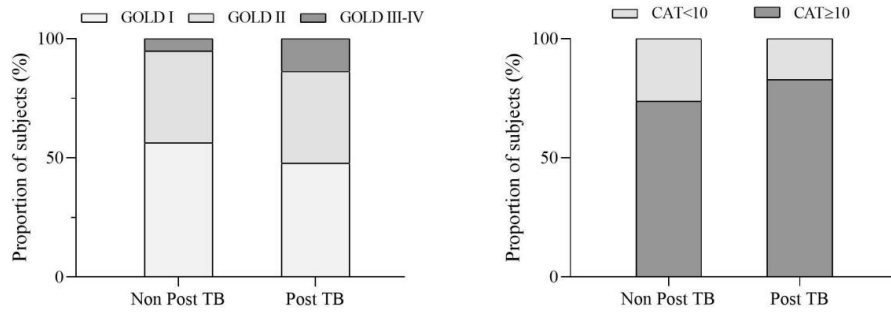

Left panel shows the proportion of subjects according to GOLD stage; right panel shows the proportion of subjects according to CAT score. GOLD: Global Initiative for Chronic Obstructive Lung Disease. CAT: COPD assessment test.

**Figure E3. The prevalence of airflow obstruction, restrictive pattern and small airway dysfunction based on post TB status.**

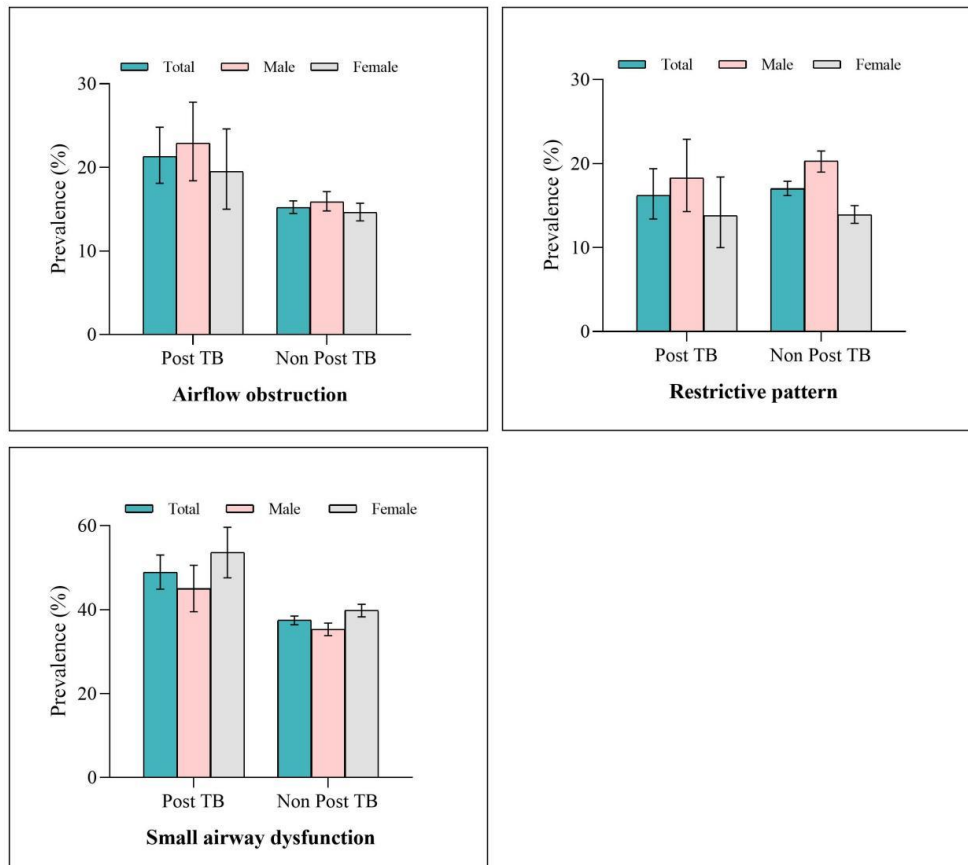

Bars represent mean prevalence and error bars represent 95% CI.

**Table E1. Participant characteristics and lung function parameters according to presence of a restrictive pattern and post TB status.**

| Variables                            | Restrictive Pattern |                          |                | Normal spirometry <sup>#</sup> |                          |                |
|--------------------------------------|---------------------|--------------------------|----------------|--------------------------------|--------------------------|----------------|
|                                      | Post TB<br>(n=99)   | Non Post TB<br>(n=1,374) | <i>P</i> value | Post TB<br>(n=381)             | Non Post TB<br>(n=5,466) | <i>P</i> value |
| Male                                 | 60 (60.6 %)         | 799 (58.2 %)             | 0.825          | 193 (50.7 %)                   | 2519 (46.1 %)            | 0.094          |
| Age, years                           | 48.77 (15.30)       | 37.78 (14.05)            | <0.001         | 47.89 (15.10)                  | 39.28 (14.98)            | <0.001         |
| City dwellers                        | 46 (46.5 %)         | 456 (33.2 %)             | <0.001         | 157 (41.2 %)                   | 1844 (33.7 %)            | 0.004          |
| Education level                      |                     |                          |                |                                |                          |                |
| Primary school and lower             | 51 (51.5 %)         | 568 (41.3 %)             |                | 218 (57.2 %)                   | 2368 (43.3 %)            |                |
| Middle and high school               | 35 (35.4 %)         | 568 (41.3 %)             | 0.013          | 115 (30.2 %)                   | 2140 (39.2 %)            | <0.001         |
| College and higher                   | 13 (13.1 %)         | 238 (17.4 %)             |                | 48 (12.6 %)                    | 958 (17.5 %)             |                |
| Smoking status                       |                     |                          |                |                                |                          |                |
| Never smoker                         | 65 (65.7 %)         | 1005 (73.2 %)            | 0.197          | 255 (66.9 %)                   | 4004 (73.3 %)            | 0.008          |
| Ever smoker                          | 34 (34.3 %)         | 368 (26.8 %)             |                | 126 (33.1 %)                   | 1460 (26.7 %)            |                |
| Comorbidities                        |                     |                          |                |                                |                          |                |
| Hypertension                         | 22 (22.2 %)         | 106 (7.7 %)              | <0.001         | 58 (15.2 %)                    | 422 (7.7 %)              | <0.001         |
| Heart disease                        | 2 (2.0 %)           | 24 (1.7 %)               | 0.566          | 10 (2.6 %)                     | 84 (1.5 %)               | <0.001         |
| Diabetes mellitus                    | 1 (1.0 %)           | 11 (0.8 %)               | 1.000          | 9 (2.4 %)                      | 36 (0.7 %)               | 0.200          |
| Dyslipidemia                         | 10 (10.1 %)         | 73 (5.3 %)               | 0.04           | 47 (12.3 %)                    | 347 (6.3 %)              | <0.001         |
| Respiratory symptoms                 |                     |                          |                |                                |                          |                |
| Frequent cough                       | 12 (12.1 %)         | 102 (7.4 %)              | 0.076          | 67 (17.6 %)                    | 524 (9.6 %)              | <0.001         |
| Sputum                               | 16 (16.2 %)         | 120 (8.7 %)              | 0.047          | 63 (16.5 %)                    | 505 (9.2 %)              | <0.001         |
| Recurrent wheezing                   | 5 (5.1 %)           | 43 (3.1 %)               | 0.016          | 31 (8.1 %)                     | 202 (3.7 %)              | <0.001         |
| Dyspnea in daily life                | 25 (25.3 %)         | 271 (19.7 %)             | 0.052          | 125 (32.8 %)                   | 1042 (19.1 %)            | <0.001         |
| Lung function parameters             |                     |                          |                |                                |                          |                |
| FVC pre-BD % pred                    | 80.22 (12.97)       | 80.77 (17.66)            | 0.036          | 112.73 (22.32)                 | 109.56 (20.35)           | 0.007          |
| FVC post-BD % pred                   | 77.58 (11.47)       | 77.62 (11.25)            | 0.340          | 113.52 (21.82)                 | 109.91 (18.93)           | 0.002          |
| FEV <sub>1</sub> pre-BD % pred       | 78.38 (13.72)       | 81.85 (15.22)            | <0.001         | 109.52 (25.35)                 | 106.82 (21.17)           | 0.043          |
| FEV <sub>1</sub> post-BD % pred      | 78.88 (12.10)       | 81.33 (12.09)            | <0.001         | 113.40 (24.21)                 | 110.66 (20.48)           | 0.032          |
| FEV <sub>1</sub> /FVC pre-BD, %      | 81.18 (10.15)       | 86.00 (9.82)             | <0.001         | 80.63 (8.02)                   | 82.38 (8.33)             | <0.001         |
| FEV <sub>1</sub> /FVC post-BD, %     | 84.26 (7.97)        | 88.46 (7.15)             | <0.001         | 82.95 (6.81)                   | 84.95 (6.60)             | <0.001         |
| FEV <sub>1</sub> /FVC pre-BD % pred  | 98.45 (12.28)       | 102.24 (11.48)           | <0.001         | 97.12 (9.41)                   | 97.74 (9.68)             | 0.213          |
| FEV <sub>1</sub> /FVC post-BD % pred | 102.13 (9.29)       | 105.17 (8.30)            | <0.001         | 99.87 (7.51)                   | 100.79 (7.48)            | 0.022          |
| MMEF pre-BD % pred                   | 55.96 (27.69)       | 67.78 (27.92)            | <0.001         | 72.98 (32.07)                  | 77.87 (29.57)            | 0.005          |
| MMEF post-BD % pred                  | 59.38 (25.42)       | 73.20 (61.17)            | <0.001         | 82.48 (32.92)                  | 87.26 (49.89)            | 0.011          |
| FEF <sub>50%</sub> pre-BD % pred     | 68.80 (27.44)       | 77.92 (25.19)            | <0.001         | 88.83 (29.84)                  | 89.43 (27.04)            | 0.703          |
| FEF <sub>50%</sub> post-BD % pred    | 74.48 (26.14)       | 82.28 (24.65)            | <0.001         | 100.41 (29.72)                 | 98.88 (26.65)            | 0.340          |
| FEF <sub>75%</sub> pre-BD % pred     | 69.60 (40.65)       | 85.75 (41.37)            | <0.001         | 86.73 (54.23)                  | 88.54 (45.13)            | 0.525          |
| FEF <sub>75%</sub> post-BD % pred    | 79.86 (47.32)       | 93.06 (42.02)            | <0.001         | 101.16 (59.30)                 | 101.41 (46.69)           | 0.938          |
| SpO <sub>2</sub> , %                 | 92.25 (6.03)        | 93.30 (5.14)             | 0.049          | 90.89 (6.38)                   | 93.24 (5.36)             | <0.001         |

Data are expressed as number (%) or mean (standard deviation, SD). COPD=chronic obstructive pulmonary disease. pre-BD=pre-bronchodilator. post-BD=post-bronchodilator. FVC=forced vital capacity. FEV<sub>1</sub>=forced expiratory volume in the first second. MMEF=maximum mid-expiratory flow. FEF=forced expiratory flow. SpO<sub>2</sub>=oxyhemoglobin saturation. Normal spirometry<sup>#</sup>: post-BD FEV<sub>1</sub>/FVC≥LLN and post-BD FVC>LLN.

**Table E2. Adjusted OR for airflow obstruction according to post TB status.**

| Variables                | Overall subjects |         | Never smokers    |         |
|--------------------------|------------------|---------|------------------|---------|
|                          | OR (95%CI)       | P value | OR (95%CI)       | P value |
| Age (10 year increments) | 1.16 (1.11-1.21) | <0.001  | 1.13 (1.08-1.20) | <0.001  |
| Male gender              | 1.14 (0.98-1.32) | 0.083   | 1.05 (0.90-1.23) | 0.534   |
| Post TB                  | 1.31 (1.05-1.62) | 0.013   | 1.37 (1.04-1.78) | 0.023   |
| Middle and high school   | 1.25 (1.01-1.56) | 0.044   | 1.16 (0.90-1.50) | 0.251   |
| Primary school or less   | 1.07 (0.84-1.35) | 0.599   | 0.92 (0.70-1.22) | 0.561   |
| City dwellers            | 0.75 (0.64-0.88) | 0.001   | 0.79 (0.65-0.96) | 0.019   |
| Ever-smoker              | 1.05 (0.90-1.23) | 0.546   |                  |         |
| Exposure to HAP          | 1.54 (1.30-1.81) | <0.001  | 1.64 (1.35-2.00) | <0.001  |
| Occupational exposure    | 0.89 (0.73-1.09) | 0.271   | 0.78 (0.60-1.01) | 0.065   |
| History of asthma        | 2.03 (1.39-2.91) | <0.001  | 2.35 (1.47-3.67) | <0.001  |

OR=odds ratio, CI=confidence interval. TB=tuberculosis. HAP= household air pollution.

**Table E3. Adjusted OR for small airway dysfunction according to post TB status.**

| Variables                | Overall subjects |         | Never smokers    |         |
|--------------------------|------------------|---------|------------------|---------|
|                          | OR (95%CI)       | P value | OR (95%CI)       | P value |
| Age (10 year increments) | 1.35 (1.30-1.40) | <0.001  | 1.29 (1.23-1.34) | <0.001  |
| Male gender              | 0.78 (0.69-0.87) | <0.001  | 0.76 (0.68-0.86) | <0.001  |
| Post TB                  | 1.28 (1.07-1.53) | 0.006   | 1.47 (1.18-1.83) | 0.001   |
| Middle and high school   | 1.31 (1.12-1.53) | 0.001   | 1.17 (0.98-1.40) | 0.088   |
| Primary school or less   | 0.95 (0.80-1.13) | 0.542   | 0.87 (0.71-1.06) | 0.159   |
| City dwellers            | 0.70 (0.62-0.79) | <0.001  | 0.71 (0.62-0.82) | <0.001  |
| Ever-smoker              | 1.16 (1.02-1.32) | 0.021   |                  |         |
| Exposure to HAP          | 1.29 (1.15-1.45) | <0.001  | 1.31 (1.15-1.51) | <0.001  |
| Occupational exposure    | 1.19 (1.03-1.38) | 0.021   | 1.16 (0.97-1.39) | 0.106   |
| History of asthma        | 2.30 (1.61-3.32) | <0.001  | 2.34 (1.51-3.70) | <0.001  |

OR=odds ratio, CI=confidence interval. TB=tuberculosis. HAP= household air pollution.

**Table E4. Odds ratio (95% confidence interval) for occurrence of respiratory symptoms according to post TB.**

|                      | Non Post TB | Post TB          | <i>P</i> value |
|----------------------|-------------|------------------|----------------|
| Cough: yes/no        | 757/7,231   | 109/498          |                |
| Crude OR (95%CI)     | 1.00 (Ref)  | 2.09 (1.67-2.60) | <0.001         |
| Adjusted OR (95% CI) | 1.00 (Ref)  | 1.66 (1.31-2.09) | <0.001         |
| Sputum: yes/no       | 750/7,236   | 110/496          |                |
| Crude OR (95%CI)     | 1.00 (Ref)  | 2.14 (1.71-2.66) | <0.001         |
| Adjusted OR (95% CI) | 1.00 (Ref)  | 1.63 (1.28-2.05) | <0.001         |
| Wheezing: yes/no     | 310/7,674   | 54/553           |                |
| Crude OR (95%CI)     | 1.00 (Ref)  | 2.42 (1.77-3.24) | <0.001         |
| Adjusted OR (95% CI) | 1.00 (Ref)  | 1.68 (1.21-2.29) | 0.001          |
| Dyspnea: yes/no      | 1,570/6,240 | 198/408          |                |
| Crude OR (95%CI)     | 1.00 (Ref)  | 1.98 (1.66-2.37) | <0.001         |
| Adjusted OR (95% CI) | 1.00 (Ref)  | 1.31 (1.08-1.59) | 0.006          |

Adjusted OR: adjustments for age, sex, region and education plus exposure to HAP and occupation, and smoking status.
